# Supplementary material for: Laboratory evaluation of particle size-selectivity of optical low-cost particulate matter sensors
Source: Copernicus journal article supplement (doi:10.5194/amt-2019-422), 2019-12-09
Supplement: Supplementary file [file amt-2019-422-AC2-supplement.pdf]

Anonymous Referee #1

Received and published: 3 February 2020

*"In this work, Kuula et al. present an investigation of counting efficiency as a function of size for a series of low-cost light scattering devices. The research question that the authors seek to answer (whether low-cost sensors can correctly assign particles to the appropriate PM mass fractions) is an important one. The work appears well thought out and carefully conducted, although the manuscript is below average from an English language perspective. There are dozens of grammatical and stylistic mistakes that will need attention prior to publication. However, the authors present a novel experimental procedure and some interesting results, so I am supportive of publication if this and other concerns are addressed in a revised manuscript. Comments on how the presentation of the methods and the interpretation of the results could be improved are below."*

We thank you for your constructive feedback. Several improvements have been made to the manuscript according to the more detailed comments.

*Major Comments:*

*"One major drawback of this work is that the authors appear to have used a "forced flow" of 1 L/min through each sensor, which may not be in accordance with the manufacturer's intended use. The use of a non-standard flow rate (i.e., one that is different from the manufacturer's recommendation) could compromise a sensor in a number of ways. For example, it could lead to differential inertial losses of particles as they transmit through the sensor. Or, it could lead to variable pulse widths of particles during detection that deviate from the expected pulse widths during calibration. The authors need to verify that this method of testing under a forced flowrate did not affect sensor response. One way would be to repeat these tests at flow rates of 0.5 and 2 Lpm to see if the response factors change. If they do change, then the results presented here might lead to misinterpretation...I do not support publication of this manuscript until this issue is investigated further and/or resolved."*

Below is the copy of our response to Referee #2 (concerning the same question):

There is no clear theoretical basis as to why a different flow rate would change the way the sensor discriminates different particle sizes. Assuming the sensors function as spectrometers (which the results of this study suggest they do, at least partly), the size discrimination of such devices is predicated on the analysis of pulse height caused by the scattering light of particle (Mie-theory). Change in the flow rate would change the frequency (i.e. number concentration) and duration of pulses but not their height. Whether the measured absolute concentrations were higher than expected is trivial as the data analysis of this study was based on normalized concentrations. Although possible, the effect of particle-size dependent sampling losses was originally estimated to be negligible, and as all the tested sensors seemed to exhibit similar size discrimination characteristics as what previous studies had shown, the effect of ancillary flow rate was not addressed in any way.

However, to ensure that the ancillary flow rate did not affect the results, additional tests were conducted with flow rates of 0.5 and 2 L min<sup>-1</sup>. Instead of testing all the three sensor units of the six different sensor models, only a single unit (unit #3) for each sensor model was evaluated. The results (Fig. 1, attachment) indicate that different flow rates had no meaningful effect on the responses. The SDS011 shows slightly stronger response for particles larger than ~2 – 3 μm, but this is probably resulting from operator inconsistency (or randomness) because the change is similar for both 0.5 and 2 L min<sup>-1</sup> flow rates. The B5W sensor has weaker response for particle sizes larger than ~4 – 5 μm with 2 L min<sup>-1</sup> flow rate which suggests that the sampling losses may have increased. However, the response

is similar for 0.5 and 1 L min<sup>-1</sup> flow rates (B5W was originally designed to be used with a heater resistor-induced flow which is most probably closer to 0.5 than 2 L min<sup>-1</sup>). The difference in PPD42NS responses, which imply that the losses may have increased for smaller and not higher flow rates, is attributed to randomness.

While conducting the additional flow rate tests, the Sharp sensors were found to exhibit completely different characteristics to what was previously measured. The underlying reason for this is still unknown, but it is possible that a prototyping breadboard, which was used to make the required connections for the external resistor and capacitor, had loose connections which resulted in misleading bias measurements. Nevertheless, all the Sharp sensors were re-evaluated with the original 1 L min<sup>-1</sup> flow rate and the unit #3 was tested additionally with the 0.5 and 2 L min<sup>-1</sup> flow rates. The new valid detection range was measured to be < 0.8 μm which is no longer in an obvious conflict with the results of the previously mentioned study of Wang et al. (2015). Considering the additional tests, it appears that the different flow rates may influence the sensor response in smallest particle sizes (< 0.55 μm), but the responses with 0.5 and 1 L min<sup>-1</sup> flow rates are so similar that the stated valid detection range remains the same. Smaller flow rates are likely to better represent the original flow rate, which for the Sharp sensors, was based on plain diffusion.

Added to manuscript section 2.2.2 "Sampling configuration": "Although there is no clear theoretical basis as to why a different flow rate would affect the way the sensor discriminates different particle sizes (apart from the different particle size-specific sampling losses), additional tests were conducted with flow rates of 0.5 and 2 L min<sup>-1</sup> to ensure that this was indeed the case (see Supplemental Figure S2)."

Section regarding the results of Sharp GP2Y1010AU0F has been revised as: "The response function of the GP2Y1010AU0F is shown in Figure 4d, and its valid detection range appears to be approximately < 0.8 μm. Like the previously discussed sensors, the GP2Y1010AU0F can be used to measure small particles (e.g., PM<sub>1</sub>) but not coarse mode particles. Several laboratory evaluations have been previously conducted for the GP2Y1010AU0F, but none of these have assessed its detection range using monodisperse test aerosols (Li and Biswas, 2017; Manikonda et al., 2016; Sousan et al., 2016). Wang et al. (2015) used atomized polystyrene latex (PSL) particles to evaluate the effect of particle size on the GP2Y1010AU0F response, but no concluding remarks can be obtained from these results. The study method utilized only three different sized PSLs; moreover, it was not designed to investigate the complete detection range of the GP2Y1010AU0F. However, according to the authors, the results implied that the sensor was more sensitive to 300 nm particles than to 600 and 900 nm particles, which is in slight disagreement with the results of this study whereby the normalized detection efficiency curve shows the highest sensitivity peak for 0.6 μm sized particles as well as a decreasing trend for particles smaller than this. There is no obvious explanation for this discrepancy, but it is worth re-emphasizing the differences in the used evaluation approaches."

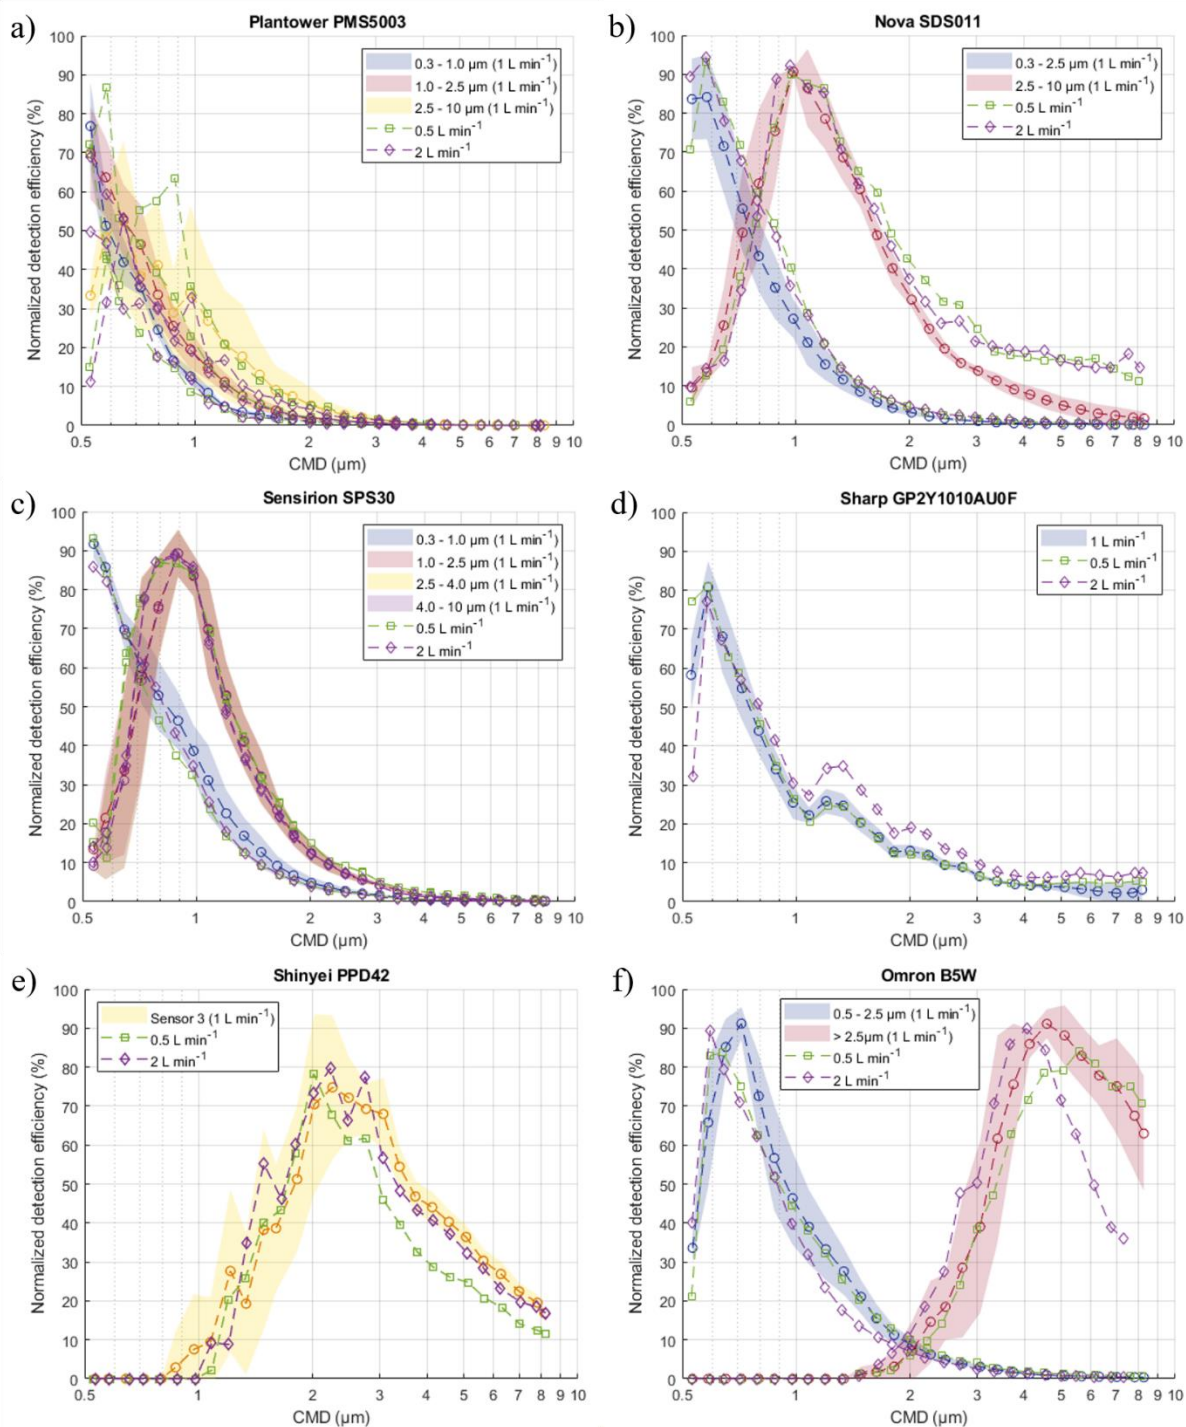

Fig 1. Results of the additional tests.

*"I think the VOAG method for generating a sequence of monodisperse particles of varying size is both novel and useful to the community. However, I would appreciate more detail on how the method is implemented so that others can properly reproduce this method. Such details could be enumerated as supplemental material."*

All necessary running parameters of the VOAG and GP50 have been presented in the supplementary material Tables S1-2.

Comments on the Methods section:

*“The Methods section could be organized better and was missing key information needed to reproduce the work.”*

See our previous comment. Improvements to the Methods section have been made according to the referee comments listed in the next sections.

*Comments on technical issues:*

*“1. Table 1: The “number of size bins” column is problematic. It’s not appropriate to compare the number of PM mass fractions reported by the low-cost sensors to the number of size bins that the GRIMM 1.108 classifies particle into. Perhaps the authors could remedy this problem by creating two columns: one labeled “number of mass fractions reported” and “number of particle size bins”. For example, the SPS30 reports data in 4 mass fractions and 5 particle size bins.”*

Due to space limitations, the column “Number of size bins” was rephrased as “Number of mass fractions reported” but no additional column was added. Column “Sensor output” was modified for the GRIMM as “All fractions individually”.

*“2. Line 76: Why did the authors remove the mechanism that drives sample flow through some of the sensors but not others? Specifically, why did they remove the air heating resistors from the PPD42 and B5W but not remove the fans from the PMS5003, SDS011, and SPS30? This discrepancy seems like it could lead to an unfair comparison between different sensors. A sensor’s output is partially determined by how quickly and efficiently particles are drawn into the sensing zone. If the flow rate through the sensor is modified, the output of the modified sensor might differ from the output of the “as-purchased” sensor. For example, results presented by Tryner et al. (doi:10.1039/C9EM00234K) indicate that varying the flow rate through a modified PMS5003 sensor changes the output. Since the authors modified some of the sensors used in this study, the results presented here might not be directly transferrable to unmodified sensors being used in the field.”*

All decisions regarding the used sampling setups were based on two factors. Most importantly, the configuration had to be such that the reference aerosol remained representative and valid throughout the test run. A secondary factor was that the configuration had to resemble the original configuration as closely as possible.

When relied on convection, the sensor must be orientated in an upright position, and the sample needs to be fed to the sensor from the bottom. This poses practical issues which are hard to overcome. For example, it is unclear how a fresh and representative sample could be provided to the proximity of the resistor without disturbing the temperature gradient and/or the flow rate of the convection itself. The feeding flow rate would have to be very small in order to avoid any disturbance, but this would simultaneously compromise the explicitness of the reference aerosol. The use of primary standard reference particles was one of the most important elements of this study. Regarding the PPD42NS specifically, if the resistor-demanded orientation is used, the lenses of this sensor are facing towards the incoming flow (forward angle scattering) which, consequently, exposes them to fouling (drift in sensitivity). This is a major problem, which we encountered in our previous paper (10.3390/s17122915), and there is no clear solution for this apart from reversing the flow direction. On a general note, the convection-based flow is poorly suited for any kind of sampling due to its susceptibility to external disturbances, such as the dynamic effects of wind and changes in ambient temperature.

Removing the fans from the PMS5003 and SPS30 would most probably lead to significant sampling losses due to their 90-degree elbows (and no mechanical flow through the sensor), and the obvious way to account for this would be to relocate the intake (drill an alternative hole to the sensor body) so that the sample is introduced directly to the detection zone. However, this is most certainly not the way the sensors are typically used. The SDS011 would probably function acceptably even without its fan, but it was considered better to retain the original configuration.

We agree that the testing setups are not perfect and that currently, some of the sensors are probably used in a manner that they were not designed for. However, creating a uniform experiment configuration for sensors which all entail different type (and poorly designed) layouts and flow rates will always be a compromise of some sort. To the extent that the custom sampling setups may have affected the outcome, we want to underline the main finding of this study is that the sensors do not measure particle sizes which their technical specifications imply, and that the ancillary flow rates, which were discussed earlier, did not have a significant impact on the results.

Study of Tryner et al. is not helpful as the particle size discrimination of PMS5003 was not investigated; it likely that the concentrations increased across all outputs respectively.

*“3. Lines 85-89: The PMS5003 reports each mass fraction two ways: “CF=1, standard particle” and “under atmospheric environment”. Which values were used in the data analyses presented here?”*

Added to Table 1 notes: “Standard particle (CF=1) output was used.”

*“4. Lines 164-165: Please state the fraction of raw measurement points that were disregarded.”*

Added: “(~ 2.1 % of the data)”

*“5. Line 170: Equation 3 is not clear. What is the maximum Sensor/APS ratio? Was this the maximum ratio measured during the entire 60-minute long test run?”*

Maximum Sensor/APS ratio refers to the maximum Sensor/APS ratio measured during a single test run.

Added: “Maximum Sensor/APS ratio refers to the maximum ratio measured during a single test run.”

*“6. Line 175: One issue is that the APS is known to have poor counting efficiency for liquid droplets above about 5 microns in diameter. Did the authors account for this artifact? See <https://doi.org/10.1016/j.jaerosci.2005.03.009>”*

This artifact was not accounted.

Added to section 2.2.2 “Sampling configuration”: “Although the reference instrument APS is known for having decreased counting efficiency for liquid droplets over ~5 μm in size (Volckens and Peters, 2005), no additional corrections were used.”

*“7. Line 179-180: This definition of “valid detection ranges” is not clear. Do the authors mean that the valid detection range was the range of CMDs for which the normalized detection efficiency was greater than 50%? If so, please consider also rephrasing the text on lines 209-210 as something like “(the valid detection range was defined as the range of particle sizes for which normalized detection efficiency was > 50%)”.*

Definition of > 50 % was not used because the obtained detection efficiency ranges were different for different sensor models (e.g. not from 0 to 100 %) and the normalized detection efficiency does not

describe the proportion of measured concentrations. A detailed example how the upper half of the normalized detection efficiency curve was calculated has been added to the supplementary material.

Added to section 2.3 "Data processing": "A detailed example how the data was processed and how the valid detection ranges were calculated is shown in the Supplementary Material".

*Comments of organization:*

*"1. Lines 75-84: This information should be moved to the "Sampling configuration" section. These methods are difficult to understand or justify without additional knowledge of the system used to pass monodisperse aerosol through the sensor."*

This paragraph was moved to section 2.2.2 "Sampling configuration".

*"2. Lines 85-82: This information should be moved to the "Data processing" section."*

It is assumed that the referee means lines 85-89 (otherwise it contradicts the comment above). This information was moved to section 2.3 "Data processing".

*"3. Lines 89-90: Please move the sentence that starts "Three units of each sensor..." to the end of the first paragraph in Section 2.1."*

Corrected.

*"4. Lines 90-93: Please start a new paragraph here that contains the information on the GRIMM 1.108."*

Corrected.

*"5. Line 95: Section 2.2.1 should start with a sentence that says, "The aerosol sampled by the low-cost sensors was generated using a Vibrating Orifice Aerosol Generator3450 (VOAG, TSI Inc., USA)." That way readers will know why the information contained in this section is relevant."*

Corrected.

*"6. Lines 101-102, "This aerosol generation method...": This sentence is neither relevant nor helpful. Please delete it."*

Deleted.

*"7. Lines 121-125: The second sentence in this paragraph is more helpful than the first. I suggest rephrasing as "The novelty of the aerosol generation method used in this research is based on the observation that the particle size of the monodisperse and constant number concentration reference aerosol can be controlled by feeding solutions with different non-volatile concentrations to the VOAG, one after each other.""*

Rephrased as suggested.

*"8. Lines 161-162: Please show at least one example panel from Figure S2 in the main text."*

PMS5003 panel added to manuscript: "An illustration of the PMS5003 sampling arrangement is shown in Figure 3."

*"9. Lines 176-177, "The decision to divide the data into 30 bins...": This sentence is not necessary. Please consider deleting it."*

Deleted.

*“10. Lines 186-187: The sentence that begins “The previously-described data processing technique...” should be moved to the “Data processing” section.”*

Moved.

*Comments of the Results section*

*Comments on technical issues:*

*“1. Overall, the authors interpretation of their experimental results seems to be based on the tenuous assumption that the low-cost particulate matter sensors all function as aerosol spectrometers rather than as nephelometers. In the GRIMM 1.108 aerosol spectrometer, sample air is aerodynamically focused and passes through a narrowly focused laser beam so that the detector sees the light scattered by just one particle at a time. Thus, the GRIM1.108 can count and size individual particles. The low-cost sensors evaluated in this study do not aerodynamically focus the sample air and, as a result, it is unlikely that the detectors in these sensors see light scattered by individual particles. Instead, the mass concentrations reported by the low-cost sensors are most likely determined by the intensity of light scattered by a group of particles, and not from a measured particle count and size distribution.”*

Whether the sensors function as spectrometers, nephelometers, or as a combination of these two is unknown, and a thorough reverse engineering of the electronic design (and software) would be required in order to reach ultimate conclusion. According to the results of this study, the sensors exhibit some kind of size discrimination capability and this observation is in an agreement with the broader scientific community which uses sensors to measure size-specific mass fractions, such as the PM<sub>2.5</sub>. Whether the sensors function solely as spectrometers, or whether they are switching between single particle detection and total scattered light intensity measurement, remains unknown. It is worth noting that nephelometers, by design, do not have a mechanism (apart from size-selective inlets) which would allow them to size discriminate individual particles, and thus, the fact that many of the sensors evaluated in this study showed little to no response in larger particle sizes would be unexplainable. According to Mie-theory, the total intensity of the scattered light is proportional to the sixth power of particle diameter.

To avoid particle coincidence, the optical detection layout does not need to be complicated. For example, a detection volume of 1 cm<sup>3</sup> (e.g. 10 x 10 x 10 mm cube) would imply that, statistically, the concentration limit for particle coincidence is 1 cm<sup>-3</sup>. With detection volume of 0.125 cm<sup>3</sup> (e.g. 5 x 5 x 5 mm cube) the respective concentration limit is 8 cm<sup>-3</sup>. Typical number concentrations for coarse mode (1–10 μm) particles are relatively low, for instance, 7 ± 9 cm<sup>-3</sup> in urban Beijing (Wu et al. 2008 10.1016/j.atmosenv.2008.06.022) and 2 ± 3 cm<sup>-3</sup> in regional China (Shen et al. 2011, 10.5194/acp-11-1565-2011), and therefore, it is reasonable to assume that a fairly simple layout capable of measuring individual particles (at least occasionally) without additional optical or aerodynamic lenses is possible to engineer and design.

*“Results presented by Kelly et al. in 2017 (doi: 10.1016/j.envpol.2016.12.039) suggested that, for Plantower sensors, “the allocation of light scattering to PM<sub>1</sub>, PM<sub>2.5</sub>, and PM<sub>10</sub> is based on a theoretical model rather than a measurement” (pp. 495-496) and “the size distribution provided by the PMS is based on a theoretical model rather than a measurement” (pp. 497). Claims in the literature that sensors such as the PMS5003 do function as optical particle counters are dubious.”*

The conclusion by Kelly et al. is most probably right and it is in an agreement with the results of this study. But it does not provide evidence that the PMS works solely as a nephelometer.

*"2. Lines 207: I would not say that "the particle sizing of the different bins is not working properly." See the comment above for justification. I think it would be appropriate to say, "it is apparent that the PMS5003 does not accurately distinguish between the PM1, PM2.5, and PM10 size fractions." Do the ratios of the masses in the PM1, PM2.5, and PM10 change as the sensor are exposed to different particle sizes?"*

Line 207 corrected as suggested. Whether the ratio of mass changes or stays constant does not determine the difference or similarity in size discrimination capability. For example, two outputs with identical size discrimination could have different mass ratios if their relation is exponential (e.g.  $PM1 = PM2.5^2$ ). For the PMS, the ratios were mostly the same;  $PM1/PM2.5$  ( $3.7 \pm 0.4$ ),  $PM2.5/PM10$  ( $1.6 \pm 0.4$ ),  $PM1/PM10$  ( $5.8 \pm 0.9$ ).

*"3. Line 223: Levy Zamora et al. evaluated the PMSA003 sensor, so results from that study might not be directly comparable to results from this study."*

This reference was removed.

*"4. Lines 231-235: The authors state that they expect the SDS011 to measure PM2.5 more accurately than the PMS5003 based on differences in 2.5 – 10  $\mu$ m mass fractions reported by the two sensors. I don't see how differences in the 2.5 – 10  $\mu$ m mass fractions would affect the reported 0.3 – 2.5  $\mu$ m mass fractions. The two sensors have similar detection efficiencies for the 0.3 – 2.5  $\mu$ m mass fraction. How does the accuracy of PM2.5 measurements reported by the SDS011 (as reported by Badura et al. and Liu et al.) compare to the accuracy of PM2.5 measurements reported by the PMS5003 (see, for example, Malings et al., doi: 10.1080/02786826.2019.1623863)?"*

The statement is based on the notion that in practice, the SDS011 has two different outputs for ~ 0.3 – 2.5  $\mu$ m range (approximately < 0.8 and 0.7 – 1.7  $\mu$ m) whereas the PMS has only one (all three outputs seem to measure similar size fractions; < 0.7, < 0.8, and < 1  $\mu$ m). By utilizing both outputs of the SDS011 (for example, by calculating the ratio of the bins), a more accurate approximation for the mass distribution in 0.3 – 2.5  $\mu$ m range, and thus higher accuracy, is possible to obtain. Of course, the user of the sensor must be aware of the particular size discrimination characteristics of the SDS011 (e.g. PM10 does not measure PM10).

To make this clearer, the statement has been rephrased as: "For example, by calculating the ratio of bins 1 and 2, it is possible to approximate the distribution of mass in the 0.3–2.5  $\mu$ m size range, thus using an additional correction factor to obtain more accurate results."

*"5. Lines 240-241: The SPS30 product datasheet states that the SPS30 is calibrated using "a defined potassium chloride particle distribution"."*

[www.sensirion.com/fileadmin/user\\_upload/customers/sensirion/Dokumente/0\\_Datasheets/Particulate\\_Matter/Sensirion\\_PM\\_Sensors\\_SPS30\\_Datasheet.pdf](http://www.sensirion.com/fileadmin/user_upload/customers/sensirion/Dokumente/0_Datasheets/Particulate_Matter/Sensirion_PM_Sensors_SPS30_Datasheet.pdf)

To be precise, the documentation states: "PM2.5 accuracy is verified for every sensor after calibration using a defined potassium chloride particle distribution". It does not disclose how PM1, PM4 or PM10 have been calibrated. We asked Sensirion about this and the unofficial answer was that PM1 is calibrated with KCl and PM2.5, PM4 and PM10 with Arizona dust. PM4 and PM10 are just extrapolations of the PM2.5 response (which is evident according to the results of this work).

*"6. Lines 246-247: The R<sup>2</sup> values reported here provide no indication of sensor accuracy. Accuracy is related to the absolute difference between the concentration reported a low-cost sensor and a reference monitor. It's possible for the mass concentrations reported by a low-cost sensor to be very*



*different in magnitude from the concentrations reported by an FEM monitor but for the concentrations reported by the two to still be strongly correlated. Saying that the fraction of variance explained by a linear model is high doesn't imply that the model has an intercept of zero and a slope of one."*

Word "accuracies" replaced with "coefficient of determinations".

*"7. Lines 281-288: Again, the  $R^2$  values reported here provide zero information on sensor accuracy. These values only imply whether a linear model explains the relationship between concentrations reported by a reference monitor and concentrations reported by the sensor. Measures of accuracy include mean error, mean absolute error, and mean percentage error."*

Word "accuracy" replaced with "performance".

*"8. Lines 309-317: See comment #1 on the results."*

See the respective response.

*Comments on organization:*

*"1. Figure 3: This figure could be improved to help readers interpret it. A title above the legend that says "Particle size bins" would be nice. I also suggest revising the first sentence in the caption to something like "Normalized detection efficiency of the 15 particle size bins as a function of the count median diameter of the reference aerosol." Finally, please also move the sentences from lines 185-186 ("For the sake of clarity...") and line 187-188 ("Bins 14 and 15...") to the figure caption."*

Legend title added. Caption rephrased as suggested: "Figure 4. Normalized detection efficiency of the 15 particle size bins as a function of the count median diameter of the reference aerosol. Consecutively increasing and decreasing response curves indicate that the particle sizing of the instrument is functioning correctly. For the sake of clarity, degrees of measurement variation have been excluded from the figure. Bins 14 and 15, which correspond to 10–15 and 15–20  $\mu\text{m}$ , respectively, are not shown as they did not produce any response (as expected)."

*"2. Figure 4: The caption for this figure should be more informative. I suggest "Normalized detection efficiency of discretized PM mass fractions reported by the low-cost sensors as a function of the count median diameter of the reference aerosol." I also suggest moving the text on lines 201-204 ("The colored circles represent.... ranges stated by the corresponding manufacturer.") to the caption."*

Caption rephrased as suggested: "Figure 5. Normalized detection efficiency of discretized PM mass fractions reported by the low-cost sensors as a function of the count median diameter of the reference aerosol. The colored circles represent the calculated average responses of the three sensor units, and the shaded background areas represent the respective standard deviations. Standard deviations of the average CMDs were negligible due to the reliable and reproducible test method. Figure legends correspond to the bin size ranges stated by the corresponding manufacturer."

*Editorial comments:*

*"1. Line 13: The PM acronym should come before the word 'sensors'."*

Corrected.

*"2. Lines 17-18: I disagree with the statement "This implies that there are underlying reasons yet to be characterized which are causing inaccuracies in sensor measurements." The underlying reasons for why light-scattering sensors are inaccurate (regardless of cost) has been known among the aerosol*

*research community for decades; there is a vast literature on the limitations and biases associated with this measurement method.”*

This statement refers to sensor type measurements specifically, and the results of this study imply that multiple studies have been conducted without understanding what the sensors are truly measuring. We do not consider it appropriate to take a hostile stance in reasoning our study objectives and background.

*“3. Line 29: “enabling” should be “enable” and “higher resolution” should be “higher-resolution”.”*

Corrected.

*“4. Lines 30-31: It might be helpful to refer readers to some more recent studies demonstrating applications of sensor networks. See, for example, Feinberg et al., 2019 (doi:10.1016/j.atmosenv.2019.06.026) and Rickenbacker et al., 2019 (doi:10.1016/j.scs.2019.101473).”*

Study of Feinberg et al. added. Study of Rickenberg et al. was not accessible with our institute credentials and was excluded.

*“5. Line 54: I would use a phrase like “size discrimination” instead of “size selectivity” in this context. The term “size selectivity” is most often used in the aerosol literature to discuss inlet aspiration/transmission performance, such as that of a PM10 or PM2.5inertial separator.”*

Corrected.

*“6. Line 59: “cursory” should be “cursorily” or “concurrently”, depending on what the authors mean by this sentence.”*

Corrected as “cursorily”.

*“7. Line 82: Rephrase as “However, the more stable sample flow system (i.e., fan instead of convection) might help compensate for the sub-optimal layouts of these sensors.””*

Corrected.

*“8. Line 85: “analogue” should be “analog”.”*

Corrected.

*“9. Line 86: For clarity, please change “sensor outputs shown” to “PM mass fractions listed”.”*

Corrected.

*“10. Line 92: Change “being” to “to be” and delete the word “other”. The GRIMM1.108 does not measure PM mass directly. Also, please specify which metric reported by the GRIMM 1.108 (or derived from values reported by the GRIMM 1.108) has a comparable accuracy to the filter weighing method.”*

Corrected and added: “(mass of C-factor adjusted total suspended particles)”

*“11. Line 126: Delete the word “produced”.”*

Corrected.

*“12. Lines 227-228: Consider replacing “two more clear different” with “two clearly different”.”*

Corrected.

*“13. Line 242: Revise as “and neither Web of Science nor Scopus literature research showed...”.”*

Corrected.

*“14. Line 249: Replace “align” with “alignment”.”*

Corrected.

*“15. Line 293: Replace “prominent” with “promising”.”*

Corrected.

*“16. Line 296: Add the word “Neither” before “Web of Science”.”*

Corrected.

*“17. Line 307: Replace “pertain” with “retain”.”*

Corrected.

*“18. Figure 2: The title for this graph is “Sample aerosol”, but the aerosol sampled by the ow-cost sensors is referred to as the “reference aerosol” throughout the manuscript. Please use consistent terminology.”*

Corrected.

*References*

*“GRIMM 1.108 manual: <https://wmo-gaw-wcc-aerosol-physics.org/files/opc-grimm-model-1.108-and-1.109.pdf>”*

Added.
